# Supplementary material for: Characterization of the Gut Microbiome in Healthy Dogs and Dogs with Diabetes Mellitus
Source: MDPI journal article supplement (doi:10.3390/ani13152479), 2023-08-01
Supplement: s1 [file s1]

## Supplementary Materials

Figure S1. Alpha diversity between healthy and diabetic groups.

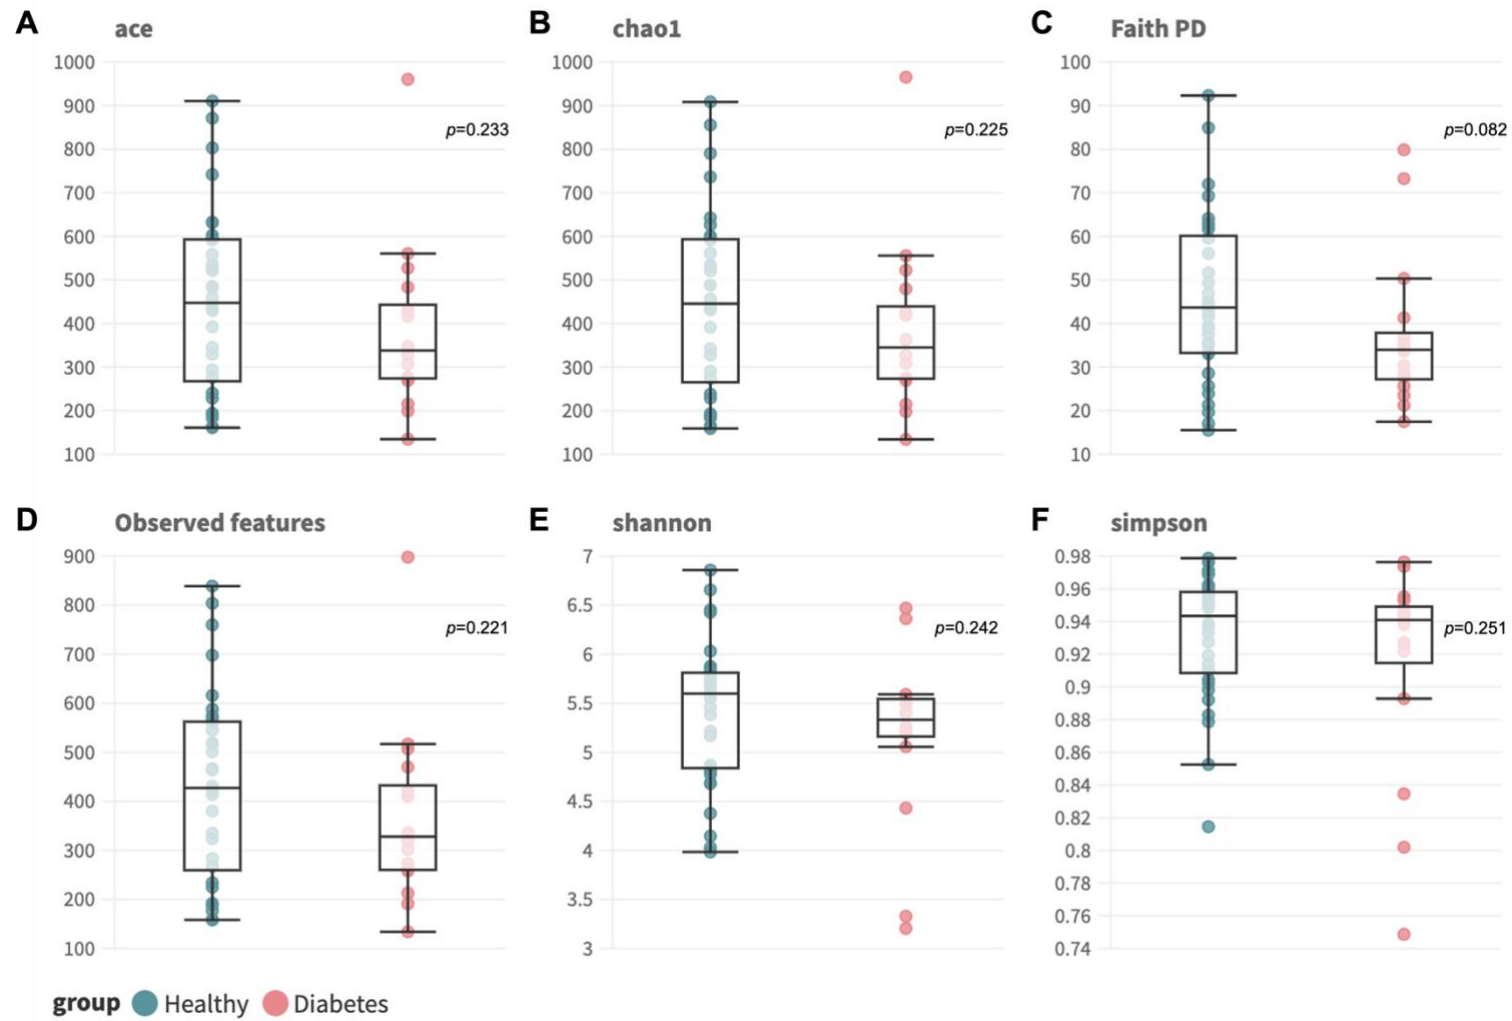

**Table S1.** Adonis test statistics of beta diversity.

| <b>Variable</b>   | <b>Bray-Curtis</b> | <b>cosine</b> | <b>Hamming</b> | <b>Jaccard</b> | <b>gUniFrac</b> | <b>uwUniFrac</b> | <b>wnUniFrac</b> | <b>wUniFrac</b> |
|-------------------|--------------------|---------------|----------------|----------------|-----------------|------------------|------------------|-----------------|
| <b>Age Group</b>  | 0.037              | 0.024         | 0.070          | 0.045          | 0.443           | 0.081            | 0.456            | 0.442           |
| <b>Breed Size</b> | 0.131              | 0.209         | 0.139          | 0.221          | 0.419           | 0.224            | 0.423            | 0.456           |
| <b>Gender</b>     | 0.789              | 0.505         | 0.733          | 0.881          | 0.724           | 0.279            | 0.725            | 0.706           |
| <b>Group</b>      | 0.027              | 0.114         | 0.271          | 0.002          | 0.251           | 0.001            | 0.243            | 0.233           |

\*Abbreviations: gUniFrac = Generalized Unique Fraction Distances; uwUniFrac = Unweighted Unique Fraction Distances; wnUniFrac = Weighted Normalized Unique Fraction Distances; wUniFrac = Weighted Unique Fraction Distances

**Table S2.** Top 10 hub nodes across networks.

| ASV                              | Taxon                                                                                | Group    | Degree |
|----------------------------------|--------------------------------------------------------------------------------------|----------|--------|
| bb3055f753c1dd21f0137f2dd59d49ec | f__Helicobacteraceae; g__Helicobacter                                                | Healthy  | 25     |
| adc085fb68c6ca79a17867f7d5dfe238 | f__Enterobacteriaceae; g__Escherichia-Shigella; s__Escherichia_sp.                   | Healthy  | 25     |
| 99acc08c0d8bfce4ad95740ddf504a83 | f__Erysipelatoclostridiaceae; g__Erysipelatoclostridium; s__[Clostridium]_spiroforme | Healthy  | 24     |
| 3c72324085d7022a73a0bf57beb0b3fc | f__Lachnospiraceae; g__Lachnospiraceae_NK4A136_group; s__uncultured_bacterium        | Healthy  | 24     |
| 7a35b8233e75ddc42a93f46704d53d1f | f__Enterobacteriaceae; g__Escherichia-Shigella; s__Escherichia_sp.                   | Healthy  | 23     |
| a25ccb444dbbbc340eb5926283bf134b | f__Prevotellaceae; g__Prevotellaceae_Ga6A1_group; s__uncultured_bacterium            | Healthy  | 23     |
| 46f019631ec39bbb20d30b4a3ae24704 | f__Streptococcaceae; g__Streptococcus; s__Streptococcus_lutetiensis                  | Healthy  | 23     |
| 8c59053f20bd4788d68a45616fc58ee8 | f__Lachnospiraceae                                                                   | Healthy  | 22     |
| a3a5f80c745d186df4adaeb7f1ef8a32 | f__Bacteroidaceae; g__Bacteroides; s__Bacteroides_vulgatus                           | Healthy  | 22     |
| 5c8e65a01a47c84e85f83cac65a5e0b5 | f__Peptostreptococcaceae; g__Peptostreptococcus; s__Peptostreptococcus_anaerobius    | Healthy  | 22     |
| 3e48499d30bb1bc080c438249c940174 | f__Pectobacteriaceae; g__Sodalis; s__bacterium_secondary                             | Diabetes | 147    |
| 8f6b2d5f877dd8c9a342fab371c4d92f | f__Prevotellaceae; g__Alloprevotella                                                 | Diabetes | 133    |
| 8c86daad090df502f91909b7794dd72a | f__Helicobacteraceae; g__Helicobacter                                                | Diabetes | 122    |
| 01ebe1bdf28b4b98908f3eb63287170f | f__Prevotellaceae; g__Alloprevotella                                                 | Diabetes | 116    |
| 50f31ae556c607afe407e6610551f887 | f__Lachnospiraceae                                                                   | Diabetes | 40     |
| 38ab081ee38e634b89bb6eaaba005e48 | f__Lachnospiraceae; g__Blautia                                                       | Diabetes | 38     |
| 851d8b0b44c78c7ce24c78b9f14b1d85 | f__Bacteroidaceae; g__Bacteroides; s__Bacteroides_stercoris                          | Diabetes | 34     |
| d862ff0f8f5c9f39ae13f080aa680bb3 | f__Lachnospiraceae; g__Roseburia; s__Roseburia_intestinalis                          | Diabetes | 30     |
| f7a1c2a7dc74eb24446faaa79f519ee6 | f__Lachnospiraceae; g__Agathobacter; s__[Eubacterium]_rectale                        | Diabetes | 30     |
| 57aefa5d0a0056772a9e3e71c4ddec1b | f__Lactobacillaceae; g__Lactobacillus; s__Lactobacillus_fermentum                    | Diabetes | 29     |
